# Supplementary material for: Tumour infiltrating lymphocytes correlate with improved survival in patients with oesophageal adenocarcinoma
Source: Springer Nature journal article supplement (doi:10.1007/s00262-016-1826-5), 2016-03-28
Supplement: MOESM1 [file 10018392]

**Supplemental Table S1** Relationship of TILs and OAC patient characteristics

|                                          |                                 | <b>CD3+</b>        | <b>CD4+</b>              | <b>CD8+</b>              | <b>FOXP3+</b>            |
|------------------------------------------|---------------------------------|--------------------|--------------------------|--------------------------|--------------------------|
| <b>Age/ years</b>                        | <i>p</i> -value                 | 0.521              | 0.347                    | 0.529                    | 0.308                    |
|                                          | <b>&lt;75</b>                   | 11.00 (0.00-27.00) | 3.30 (0.00-27.00)        | 4.85 (0.00-37.70)        | 1.30 (0.00-21.00)        |
|                                          | <b>≥75</b>                      | 14.00 (0.00-77.30) | 5.00 (0.00-43.00)        | 5.85 (0.00-38.00)        | 2.00 (0.00-14.70)        |
| <b>Sex</b>                               | <i>p</i> -value                 | 0.059              | <b>0.036</b>             | <b>0.037</b>             | <b>0.045</b>             |
|                                          | <b>Male</b>                     | 11.00 (0.00-74.00) | <b>3.30 (0.00-27.00)</b> | <b>4.70 (0.00-38.00)</b> | <b>1.15 (0.00-21.00)</b> |
|                                          | <b>Female</b>                   | 22.20 (0.00-77.30) | <b>7.85 (0.00-43.00)</b> | <b>9.00(0.00-25.70)</b>  | <b>2.50 (0.00-10.70)</b> |
| <b>ASA</b>                               | <i>p</i> -value                 | 0.338              | 0.553                    | 0.697                    | 0.173                    |
|                                          | <b>1</b>                        | 14.30 (0.00-43.30) | 2.30 (0.00-22.00)        | 6.00 (0.00-16.70)        | 1.00 (0.00-21.00)        |
|                                          | <b>2</b>                        | 12.65 (0.00-77.30) | 4.30 (0.00-43.00)        | 5.50 (0.00-37.70)        | 2.00 (0.00-13.30)        |
|                                          | <b>3</b>                        | 4.65 (0.00-77.30)  | 1.00 (0.00-16.70)        | 1.35 (0.00-38.00)        | 0.00 (0.00-11.30)        |
| <b>Performance Status</b>                | <i>p</i> -value                 | 0.944              | 0.664                    | 0.893                    | 0.818                    |
|                                          | <b>0</b>                        | 12.30 (0.00-71.00) | 2.30 (0.00-22.00)        | 5.00 (0.00-29.00)        | 1.70 (0.00-21.00)        |
|                                          | <b>1</b>                        | 10.85 (0.00-77.30) | 4.00 (0.00-19.30)        | 5.00 (0.00-38.00)        | 1.00 (0.00-13.30)        |
|                                          | <b>2</b>                        | 14.85 (0.00-72.00) | 4.50 (0.00-27.00)        | 6.35 (0.00-32.70)        | 1.30 (0.00-21.00)        |
| <b>Smoker Preop</b>                      | <i>p</i> -value                 | 0.110              | 0.088                    | 0.174                    | 0.147                    |
|                                          | <b>Yes</b>                      | 16.00 (0.00-74.00) | 4.50 (0.00-27.00)        | 6.70 (0.00-38.00)        | 2.00 (0.00-21.00)        |
|                                          | <b>No</b>                       | 10.70 (0.00-72.00) | 3.30 (0.00-22.00)        | 4.70 (0.00-32.70)        | 1.00 (0.00-13.30)        |
| <b>Serum Albumin</b>                     | <i>p</i> -value                 | 0.178              | 0.073                    | 0.069                    | 0.074                    |
|                                          | <b>&lt;35</b>                   | 4.65 (0.00-71.00)  | 1.80 (0.00-20.00)        | 2.00 (0.00-29.30)        | 0.00 (0.00-12.70)        |
|                                          | <b>≥35</b>                      | 12.65 (0.00-77.30) | 4.30 (0.00-43.00)        | 6.00 (0.00-38.00)        | 1.30 (0.00-21.00)        |
| <b>Serum Neutrophil Lymphocyte Ratio</b> | <i>p</i> -value                 | 0.901              | 0.986                    | 0.618                    | 0.531                    |
|                                          | <b>&lt;2.5</b>                  | 11.70 (0.00-74.00) | 3.30 (0.00-22.00)        | 5.00 (0.00-38.00)        | 1.70 (0.00-14.70)        |
|                                          | <b>≥2.5</b>                     | 12.50 (0.00-77.30) | 3.85 (0.00-43.00)        | 5.85 (0.00-37.70)        | 1.00 (0.00-21.00)        |
| <b>Treatment</b>                         | <i>p</i> -value                 | 0.945              | 0.949                    | 0.996                    | 0.864                    |
|                                          | <b>Surgery only</b>             | 12.00 (0.00-77.30) | 3.85 (0.00-43.00)        | 5.85 (0.00-38.00)        | 1.30 (0.00-21.00)        |
|                                          | <b>Neoadjuvant Rx + Surgery</b> | 12.00 (0.00-64.00) | 3.70 (0.00-27.00)        | 5.00 (0.00-20.70)        | 1.30 (0.00-11.30)        |

Values median with range in parentheses

**Supplemental Table S2** Relationship of TILs and OAC tumour characteristics

|                            |                 | <b>CD3</b>                | <b>CD4</b>               | <b>CD8</b>               | <b>FOXP3+</b>            |
|----------------------------|-----------------|---------------------------|--------------------------|--------------------------|--------------------------|
| <b>ypT or pT</b>           | <i>p</i> -value | <b>0.040</b>              | <b>0.014</b>             | <b>0.020</b>             | <b>0.084</b>             |
|                            | <b>T1</b>       | <b>15.00 (0.00-77.30)</b> | <b>7.00 (0.00-43.00)</b> | <b>7.00 (0.00-25.70)</b> | <b>2.00 (0.00-21.00)</b> |
|                            | <b>T2</b>       | <b>12.85 (0.00-72.00)</b> | <b>4.85 (0.00-27.00)</b> | <b>6.50 (0.00-37.70)</b> | <b>2.00 (0.00-13.30)</b> |
|                            | <b>T3</b>       | <b>11.70 (0.00-74.00)</b> | <b>2.30 (0.00-20.00)</b> | <b>4.70 (0.00-38.00)</b> | <b>1.00 (0.00-14.70)</b> |
|                            | <b>T4</b>       | <b>0.00 (0.00-12.00)</b>  | <b>0.00 (0.00-4.70)</b>  | <b>0.00 (0.00-3.70)</b>  | <b>0.00 (0.00-6.70)</b>  |
| <b>ypN or pN</b>           | <i>p</i> -value | <b>&lt;0.0001</b>         | <b>&lt;0.0001</b>        | <b>&lt;0.0001</b>        | <b>0.008</b>             |
|                            | <b>N0</b>       | <b>16.00 (0.00-77.30)</b> | <b>6.00 (0.00-43.00)</b> | <b>8.30 (0.00-37.70)</b> | <b>2.00 (0.00-21.00)</b> |
|                            | <b>N1</b>       | <b>13.35 (0.00-29.30)</b> | <b>3.65 (0.00-10.70)</b> | <b>5.20 (0.00-15.00)</b> | <b>1.65 (0.00-9.30)</b>  |
|                            | <b>N2</b>       | <b>0.00 (0.00-49.30)</b>  | <b>0.00 (0.00-10.70)</b> | <b>0.00 (0.00-29.30)</b> | <b>0.00 (0.00-9.30)</b>  |
|                            | <b>N3</b>       | <b>7.85 (0.00-74.00)</b>  | <b>2.00 (0.00-20.00)</b> | <b>2.00 (0.00-38.00)</b> | <b>0.00 (0.00-14.70)</b> |
| <b>Resection clearance</b> | <i>p</i> -value | <b>0.090</b>              | <b>0.040</b>             | 0.088                    | <b>0.017</b>             |
|                            | <b>R1</b>       | <b>8.35 (0.00-64.00)</b>  | <b>1.15 (0.00-20.00)</b> | 1.50 (0.00-18.70)        | <b>0.00 (0.00-10.00)</b> |
|                            | <b>R0</b>       | <b>13.35 (0.00-77.30)</b> | <b>4.00 (0.00-43.00)</b> | 5.85 (0.00-38.00)        | <b>1.70 (0.00-21.00)</b> |
| <b>Vascular Invasion</b>   | <i>p</i> -value | <b>0.048</b>              | <b>0.030</b>             | <b>0.011</b>             | <b>0.027</b>             |
|                            | <b>Yes</b>      | <b>10.70 (0.00-64.00)</b> | <b>1.70 (0.00-27.00)</b> | <b>4.30 (0.00-29.30)</b> | <b>1.00 (0.00-9.30)</b>  |
|                            | <b>No</b>       | <b>13.70 (0.00-77.30)</b> | <b>4.30 (0.00-43.00)</b> | <b>6.70 (0.00-38.00)</b> | <b>1.70 (0.00-9.30)</b>  |
| <b>Lymphatic Invasion</b>  | <i>p</i> -value | <b>0.022</b>              | <b>0.038</b>             | <b>0.037</b>             | <b>0.182</b>             |
|                            | <b>Yes</b>      | <b>3.30 (0.00-43.40)</b>  | <b>1.00 (0.00-27.00)</b> | <b>1.30 (0.00-15.00)</b> | <b>0.00 (0.00-9.30)</b>  |
|                            | <b>No</b>       | <b>13.70 (0.00-77.30)</b> | <b>4.30 (0.00-43.00)</b> | <b>5.70 (0.00-38.00)</b> | <b>1.30 (0.00-21.00)</b> |
| <b>Perineural Invasion</b> | <i>p</i> -value | <b>0.016</b>              | <b>0.001</b>             | <b>0.025</b>             | <b>0.033</b>             |
|                            | <b>Yes</b>      | <b>0.00 (0.00-36.00)</b>  | <b>0.00 (0.00-11.00)</b> | <b>0.00 (0.00-14.00)</b> | <b>0.00 (0.00-8.00)</b>  |
|                            | <b>No</b>       | <b>12.30 (0.00-77.30)</b> | <b>4.00 (0.00-43.00)</b> | <b>5.70 (0.00-38.00)</b> | <b>1.30 (0.00-21.00)</b> |

Values median with range in parentheses

**Supplemental Table S3** Descriptive statistics for number of TILs in OAC stratified by treatment modality

|                                 |                 | <b>CD3+ TILs</b> | <b>CD4+ TILs</b> | <b>CD8+ TILs</b> | <b>FOXP3+ TILs</b> |
|---------------------------------|-----------------|------------------|------------------|------------------|--------------------|
| <b>Surgery Only</b>             | <b>Mean*</b>    | 19.49            | 5.69             | 8.13             | 3.42               |
|                                 | <b>Median*</b>  | 12.00            | 3.85             | 5.85             | 1.30               |
|                                 | <b>Variance</b> | 525.20           | 55.87            | 105.10           | 23.13              |
|                                 | <b>Range*</b>   | 0.0-77.3         | 0.0-43.0         | 0.0-38.0         | 0.0-21.0           |
|                                 | <b>Skewness</b> | 1.224            | 2.771            | 1.572            | 1.689              |
| <b>Neoadjuvant Rx + Surgery</b> | <b>Mean*</b>    | 15.57            | 4.94             | 6.11             | 3.42               |
|                                 | <b>Median*</b>  | 12.00            | 3.70             | 5.00             | 1.30               |
|                                 | <b>Variance</b> | 206.54           | 31.98            | 28.95            | 7.91               |
|                                 | <b>Range*</b>   | 0.0-64.0         | 0.0-27.0         | 0.0-20.7         | 0.0-11.3           |
|                                 | <b>Skewness</b> | 0.877            | 1.715            | 0.679            | 1.291              |
| <b>Total</b>                    | <b>Mean*</b>    | 17.16            | 5.25             | 6.93             | 2.81               |
|                                 | <b>Median*</b>  | 12.00            | 3.70             | 5.00             | 1.30               |
|                                 | <b>Variance</b> | 336.61           | 41.46            | 60.30            | 14.21              |
|                                 | <b>Range*</b>   | 0.0-77.3         | 0.0-43.0         | 0.0-38.0         | 0.0-21.0           |
|                                 | <b>Skewness</b> | 1.329            | 2.428            | 1.790            | 1.900              |

\*Data are cells counted per field; No statistically significant difference by treatment modality

**Supplemental Table S4** Correlation between subtypes of TILs

|                                            | <b>FOXP3+</b>     | <b>CD8+</b>       | <b>CD4+</b>       |
|--------------------------------------------|-------------------|-------------------|-------------------|
| <b>CD3+</b> <i>Correlation coefficient</i> | <b>0.791</b>      | <b>0.905</b>      | <b>0.836</b>      |
| <i>p</i> -value                            | <b>&lt;0.0001</b> | <b>&lt;0.0001</b> | <b>&lt;0.0001</b> |
| <b>CD4+</b> <i>Correlation coefficient</i> | <b>0.677</b>      | <b>0.710</b>      |                   |
| <i>p</i> -value                            | <b>&lt;0.0001</b> | <b>&lt;0.0001</b> |                   |
| <b>CD8+</b> <i>Correlation coefficient</i> | <b>0.695</b>      |                   |                   |
| <i>p</i> -value                            | <b>&lt;0.0001</b> |                   |                   |

**Supplemental Table S5** Univariate and multivariate Cox regression analyses of patient and tumour factors with OAC disease free survival

|                            |        | Univariate |              |                   | Multivariate |              |                   |
|----------------------------|--------|------------|--------------|-------------------|--------------|--------------|-------------------|
|                            |        | HR         | 95%CI        | P value           | HR           | 95% CI       | p value           |
| <b>Patient factors</b>     |        |            |              |                   |              |              |                   |
| Age                        |        | 0.978      | 0.953-1.003  | 0.085             |              |              |                   |
| Sex                        | Female | 1          | Ref          |                   |              |              |                   |
|                            | Male   | 1.305      | 0.596-2.855  | 0.505             |              |              |                   |
| ASA                        | 1      | 1          | Ref          |                   |              |              |                   |
|                            | 2      | 1.571      | 0.672-3.674  | 0.297             |              |              |                   |
|                            | 3      | 1.028      | 0.373-2.833  | 0.957             |              |              |                   |
| Performance status         | 0      | 1          | Ref          |                   |              |              |                   |
|                            | 1      | 0.771      | 0.442-1.344  | 0.359             |              |              |                   |
|                            | 2      | 0.644      | 0.237-1.749  | 0.388             |              |              |                   |
| Preoperative smoker        | No     | 1          | Ref          |                   |              |              |                   |
|                            | Yes    | 0.915      | 0.555-1.509  | 0.727             |              |              |                   |
| Neoadjuvant Rx             | No     | 1          | Ref          |                   | 1            | Ref          |                   |
|                            | Yes    | 1.996      | 1.183-3.367  | <b>0.010</b>      | 1.998        | 1.145-3.487  | <b>0.015</b>      |
| <b>Immunohistochemistr</b> |        |            |              |                   |              |              |                   |
| CD3                        |        | 0.960      | 0.941-0.980  | <b>&lt;0.0001</b> |              |              |                   |
| CD4                        |        | 0.895      | 0.842-0.951  | <b>&lt;0.0001</b> |              |              |                   |
| CD8                        |        | 0.886      | 0.841-0.933  | <b>&lt;0.0001</b> | 0.894        | 0.844-0.948  | <b>&lt;0.0001</b> |
| FOXP3+                     |        | 0.885      | 0.811-0.965  | <b>0.006</b>      |              |              |                   |
| <b>Tumour factors</b>      |        |            |              |                   |              |              |                   |
| pT stage                   | 1      | 1          | Ref          |                   |              |              |                   |
|                            | 2      | 4.325      | 1.610-11.618 | 0.004             |              |              |                   |
|                            | 3      | 6.180      | 2.424-15.758 | <b>&lt;0.0001</b> |              |              |                   |
|                            | 4      | 15.913     | 4.178-60.604 | <b>&lt;0.0001</b> |              |              |                   |
| pN stage                   | 0      | 1          | Ref          |                   | 1            | Ref          |                   |
|                            | 1      | 5.796      | 2.988-11.243 | <b>&lt;0.0001</b> | 5.178        | 2.630-10.196 | <b>&lt;0.0001</b> |
|                            | 2      | 7.899      | 3.822-16.324 | <b>&lt;0.0001</b> | 3.584        | 1.639-7.840  | <b>0.001</b>      |
|                            | 3      | 6.351      | 3.036-13.288 | <b>&lt;0.0001</b> | 5.142        | 2.353-11.235 | <b>&lt;0.0001</b> |
| pM stage                   | 0      | 1          | Ref          |                   |              |              |                   |
|                            | 1      | 4.479      | 1.374-14.598 | <b>0.013</b>      |              |              |                   |
| Vascular invasion          | No     | 1          | Ref          |                   |              |              |                   |
|                            | Yes    | 2.671      | 1.657-4.307  | <b>&lt;0.0001</b> |              |              |                   |
| Lymphatic Invasion         | No     | 1          | Ref          |                   |              |              |                   |
|                            | Yes    | 2.099      | 1.213-3.635  | <b>0.008</b>      |              |              |                   |
| Perineural Invasion        | No     | 1          | Ref          |                   |              |              |                   |
|                            | Yes    | 2.450      | 1.309-4.584  | <b>0.005</b>      |              |              |                   |
| Resection clearance        | R0     | 1          | Ref          |                   | 1            | Ref          |                   |
|                            | R1     | 2.563      | 1.492-4.405  | <b>0.001</b>      | 2.600        | 1.448-4.666  | <b>0.001</b>      |

**Supplemental Table S6** Clinical and pathological factors in OAC patients that received neoadjuvant chemotherapy (n=76) based on their response to chemotherapy using tumour regression grading (TRG)

|                                     |                  | <b>Responder (TRG 2)</b> | <b>Non-responder (TRG 3-5)</b> | <b>p value</b>    |
|-------------------------------------|------------------|--------------------------|--------------------------------|-------------------|
|                                     |                  | <b>n=11</b>              | <b>n=65</b>                    |                   |
| <b>Age*</b>                         |                  | 66.58 (55.77-74.62)      | 62.46 (45.48-81.29)            | 0.253             |
| <b>Sex</b>                          | <b>Male</b>      | 11 (100)                 | 57 (87.7)                      | 0.222             |
|                                     | <b>Female</b>    | 0 (0)                    | 8                              |                   |
| <b>Performance status</b>           | <b>0</b>         | 4 (36.4)                 | 18 (27.7)                      | 0.488             |
|                                     | <b>1</b>         | 7 (63.6)                 | 45 (69.2)                      |                   |
|                                     | <b>2</b>         | 0 (0)                    | 2 (3.1)                        |                   |
| <b>ASA</b>                          | <b>1</b>         | 1 (9.1)                  | 9 (14.1)                       | 0.922             |
|                                     | <b>2</b>         | 9 (81.8)                 | 48 (73.4)                      |                   |
|                                     | <b>3</b>         | 1 (9.1)                  | 8 (12.5)                       |                   |
| <b>ypT</b>                          | <b>1</b>         | 6 (54.5)                 | 7 (10.8)                       | <b>&lt;0.0001</b> |
|                                     | <b>2</b>         | 4 (36.4)                 | 17 (26.2)                      |                   |
|                                     | <b>3</b>         | 1 (9.1)                  | 39 (60.0)                      |                   |
|                                     | <b>4</b>         | 0 (0)                    | 2 (3.1)                        |                   |
| <b>ypN</b>                          | <b>0</b>         | 11 (100)                 | 22 (33.8)                      | <b>&lt;0.0001</b> |
|                                     | <b>1</b>         | 0 (0)                    | 15 (23.1)                      |                   |
|                                     | <b>2</b>         | 0 (0)                    | 15 (23.1)                      |                   |
|                                     | <b>3</b>         | 0 (0)                    | 13 (20)                        |                   |
| <b>LN downstaged</b>                | <b>Yes</b>       | 11 (100)                 | 19 (29.2)                      | <b>&lt;0.0001</b> |
|                                     | <b>No</b>        | 0 (0)                    | 46 (70.8)                      |                   |
| <b>Differentiation</b>              | <b>G1 – Well</b> | 3 (27.3)                 | 3 (4.6)                        | 0.061             |
|                                     | <b>G2 –</b>      | 3 (27.3)                 | 17 (26.2)                      |                   |
|                                     | <b>G3 – Poor</b> | 5 (45.5)                 | 45 (69.2)                      |                   |
| <b>Resection clearance</b>          | <b>R0</b>        | 11 (100)                 | 51 (78.5)                      | 0.090             |
|                                     | <b>R1</b>        | 0 (0)                    | 65 (100)                       |                   |
| <b>Immunohistochemistry values*</b> | <b>CD3</b>       | 16.00 (0.00-43.30)       | 12.00 (0.00-64.00)             | 0.160             |
|                                     | <b>CD4</b>       | 6.00 (0.00-27.00)        | 3.30 (0.00-20.00)              | 0.055             |
|                                     | <b>CD8</b>       | 8.30 (0.00-16.70)        | 4.70 (0.00-20.70)              | 0.065             |
|                                     | <b>FOXP3+</b>    | 2.70 (0.00-11.30)        | 1.30 (0.00-9.30)               | 0.202             |

Values in parentheses are percentages unless indicated. \*Values in parentheses are range

**Supplemental Table S7** Univariate and multivariate analysis of immunohistochemical markers for response to chemotherapy (TRG 2) in OAC

|               | Univariate   |                    |              | Multivariate |                    |                |
|---------------|--------------|--------------------|--------------|--------------|--------------------|----------------|
|               | HR           | 95%CI              | P value      | HR           | 95% CI             | <i>p</i> value |
| <b>CD3</b>    | 0.967        | 0.927-1.009        | 0.119        |              |                    |                |
| <b>CD4</b>    | <b>0.885</b> | <b>0.800-0.978</b> | <b>0.017</b> | <b>0.885</b> | <b>0.800-0.978</b> | <b>0.017</b>   |
| <b>CD8</b>    | 0.912        | 0.814-1.023        | 0.116        |              |                    |                |
| <b>FOXP3+</b> | 0.831        | 0.678-1.017        | 0.073        |              |                    |                |

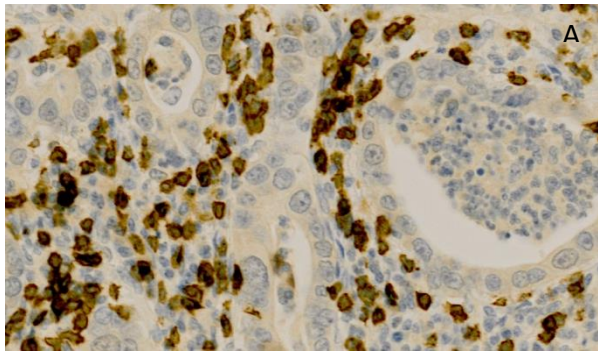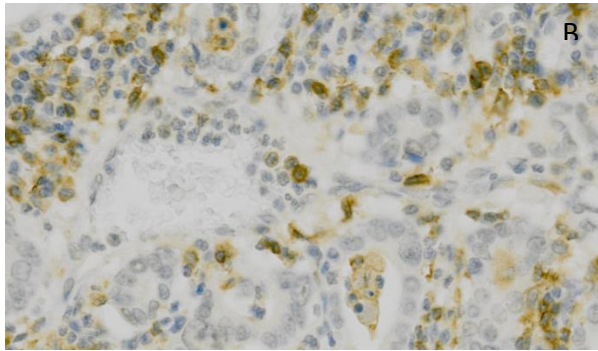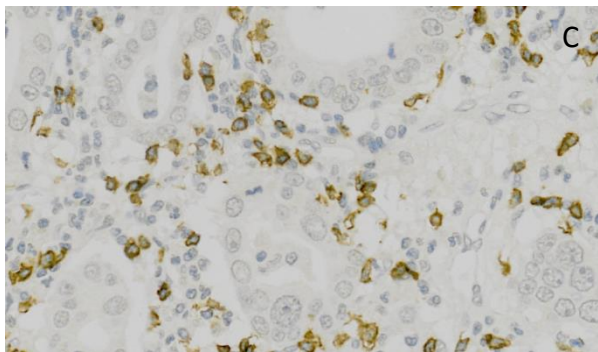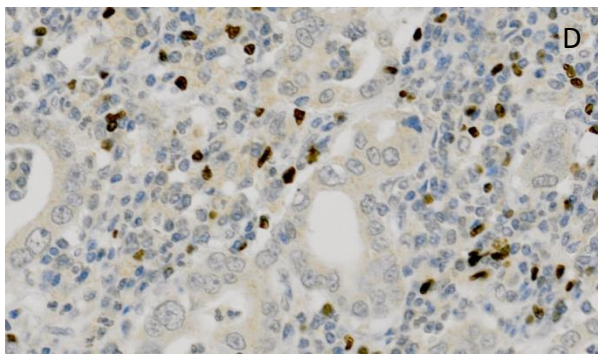

**Supplemental Figure S1** OAC Tumour infiltrating lymphocytes CD3+ (A), CD4+ (B), CD8+ (C), FOXP3+ (D)



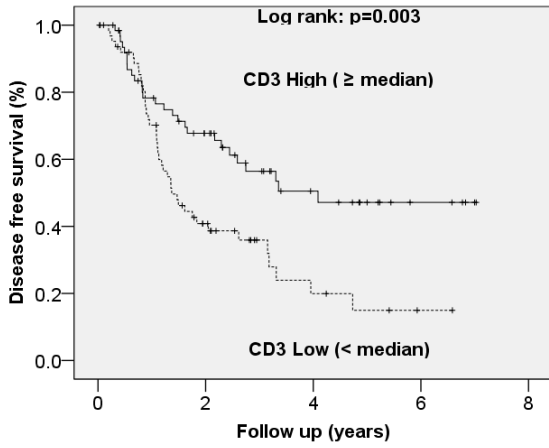

| <b>No. at risk</b> |          |          |          |          |
|--------------------|----------|----------|----------|----------|
| <b>Years</b>       | <b>0</b> | <b>2</b> | <b>4</b> | <b>6</b> |
| <b>CD3 High</b>    | 65       | 35       | 15       | 5        |
| <b>CD3 Low</b>     | 63       | 20       | 5        | 1        |

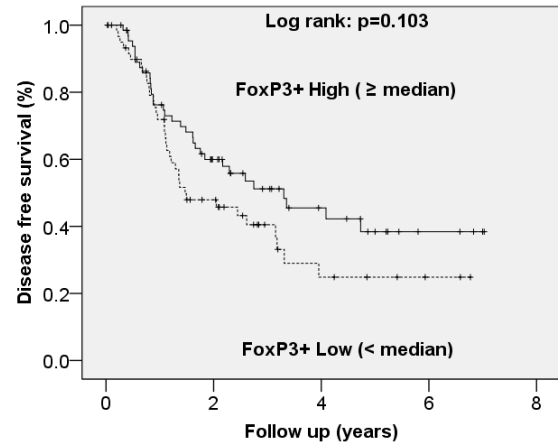

| <b>No. at risk</b> |          |          |          |          |
|--------------------|----------|----------|----------|----------|
| <b>Years</b>       | <b>0</b> | <b>2</b> | <b>4</b> | <b>6</b> |
| <b>FoxP3+ High</b> | 68       | 32       | 14       | 4        |
| <b>FoxP3+ Low</b>  | 60       | 23       | 6        | 1        |

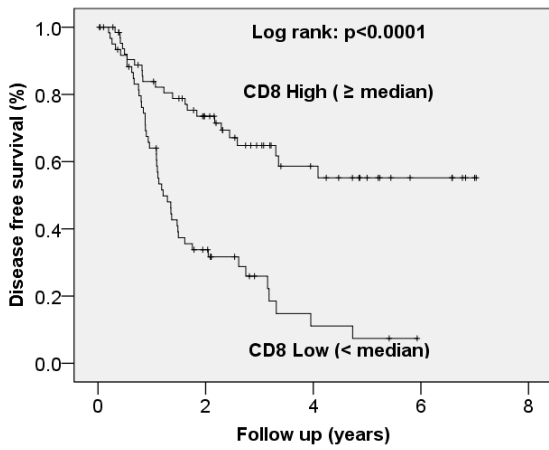

| <b>No. at risk</b> |          |          |          |          |
|--------------------|----------|----------|----------|----------|
| <b>Years</b>       | <b>0</b> | <b>2</b> | <b>4</b> | <b>6</b> |
| <b>CD8 High</b>    | 67       | 38       | 17       | 6        |
| <b>CD8 Low</b>     | 61       | 17       | 3        | 1        |

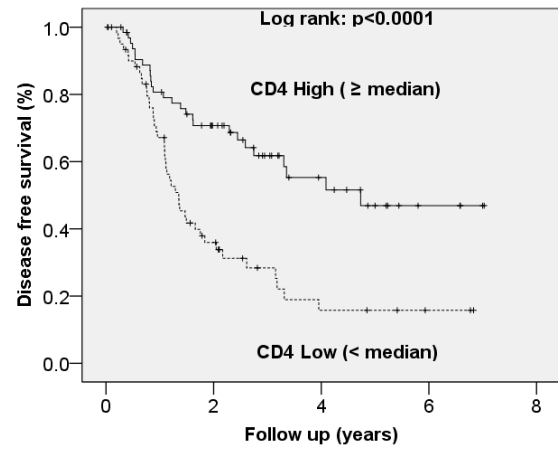

| <b>No. at risk</b> |          |          |          |          |
|--------------------|----------|----------|----------|----------|
| <b>Years</b>       | <b>0</b> | <b>2</b> | <b>4</b> | <b>6</b> |
| <b>CD4 High</b>    | 66       | 37       | 15       | 4        |
| <b>CD4 Low</b>     | 62       | 18       | 5        | 2        |

**Supplemental Figure S2** Kaplan- Meier curves of disease free survival demonstrating prognostic significance of TILs in oesophageal adenocarcinoma

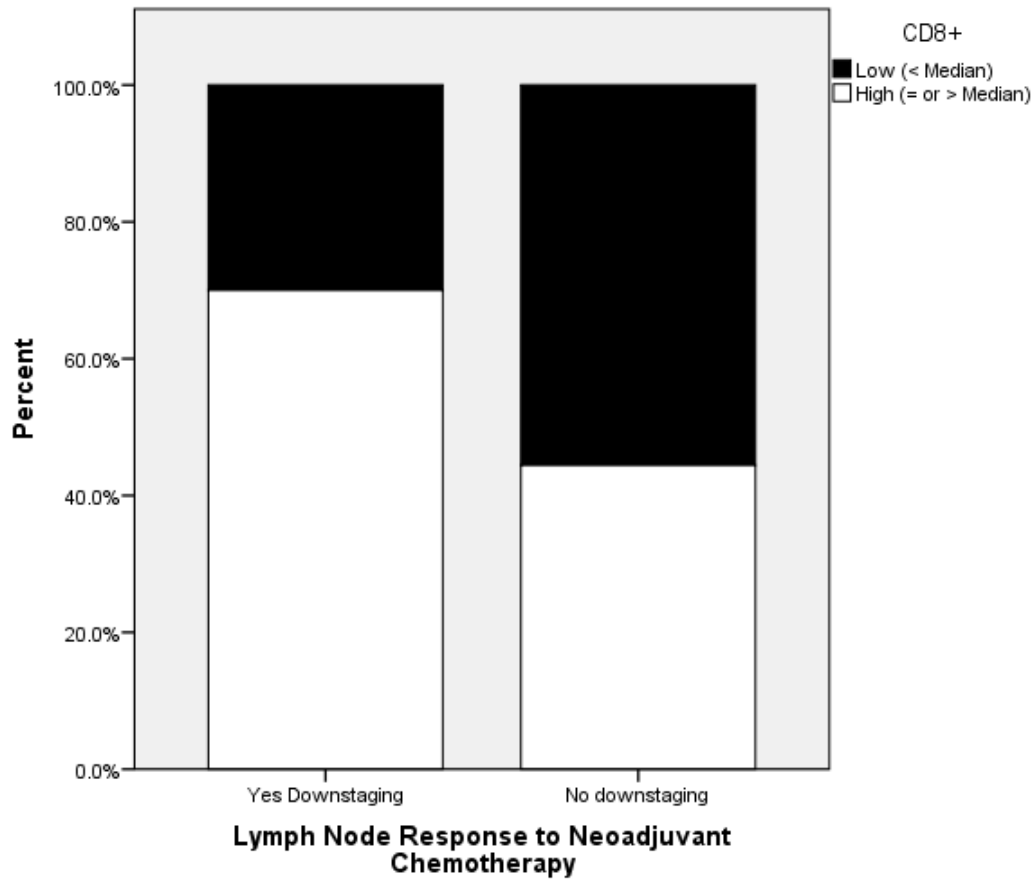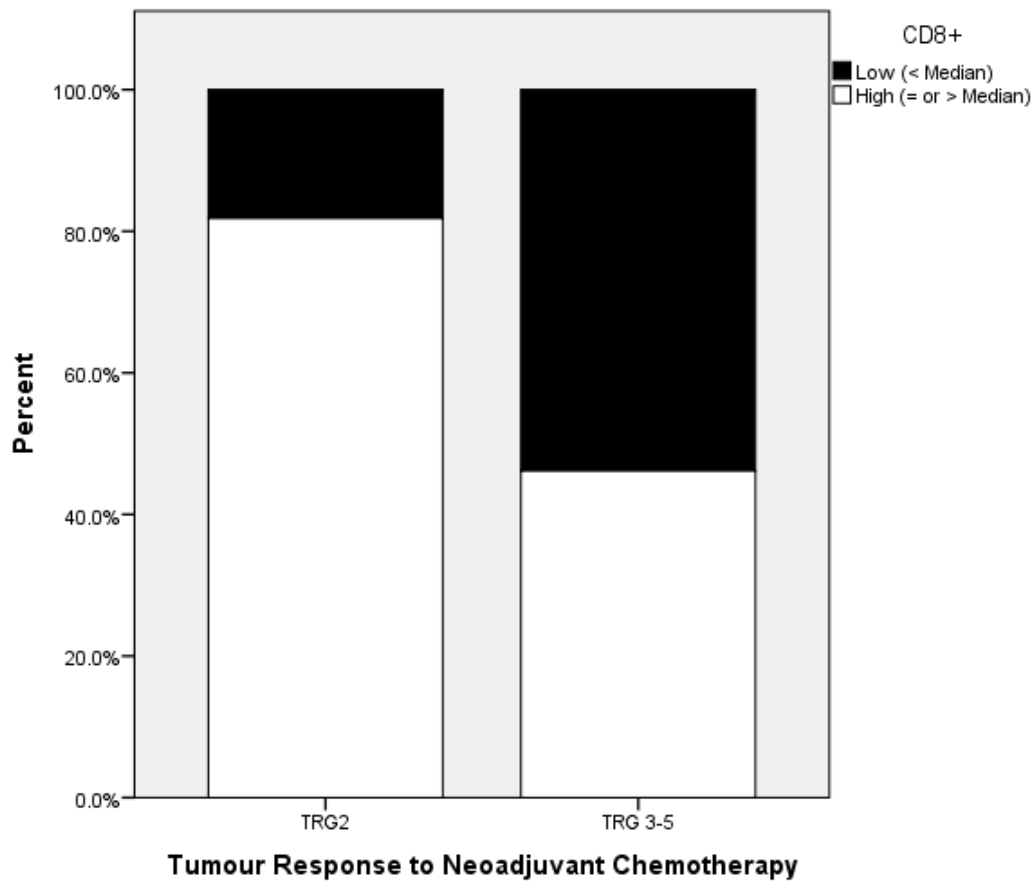

Supplemental Figure S3 CD8+ immune infiltrate in OAC assessed by tumour response to chemotherapy
